# Supplementary material
Source: HighWire-hosted journal article supplement (https://jitc.bmj.com/content/10/12/e005798)
Supplement: inline-supplementary-material-3 [file inline-supplementary-material-3.pdf]

**Supplementary Table 1. Univariate and multivariate analysis of prognostic factors associated with overall survival and recurrence-free survival in the primary cohort.**

| Variables                  | Overall survival          |                             |                          | Recurrence-free survival  |                             |                          |
|----------------------------|---------------------------|-----------------------------|--------------------------|---------------------------|-----------------------------|--------------------------|
|                            | Univariate <i>P</i> value | Multivariate <i>P</i> value | Multivariate HR (95% CI) | Univariate <i>P</i> value | Multivariate <i>P</i> value | Multivariate HR (95% CI) |
| <b>Gender</b>              |                           |                             |                          |                           |                             |                          |
| Male/Female                | 0.650                     | NA                          |                          | 0.512                     |                             |                          |
| <b>Age (years)</b>         |                           |                             |                          |                           |                             |                          |
| <65/≥65                    | 0.228                     | NA                          |                          | 0.285                     |                             |                          |
| <b>Primary site</b>        |                           |                             |                          |                           |                             |                          |
| Head/Body or tail          | 0.755                     | NA                          |                          | 0.647                     |                             |                          |
| <b>Differentiation</b>     |                           |                             |                          |                           |                             |                          |
| I/II/III                   | <b>0.036</b>              | 0.492                       | 1.225(0.687-2.184)       | 0.055                     |                             |                          |
| <b>T stage</b>             |                           |                             |                          |                           |                             |                          |
| T1+T2/ T3+T4               | 0.183                     | NA                          |                          | 0.181                     |                             |                          |
| <b>N stage</b>             |                           |                             |                          |                           |                             |                          |
| N0/N1-2                    | <b>&lt;0.001</b>          | <b>0.001</b>                | 3.814(1.686-8.628)       | <b>&lt;0.001</b>          | <b>0.036</b>                | 2.110 (1.048-4.246)      |
| <b>TNM stage</b>           |                           |                             |                          |                           |                             |                          |
| I/II/III                   | <b>&lt;0.001</b>          | 0.346                       | 0.780 (0.466-1.307)      | <b>0.001</b>              | 0.601                       | 0.883 (0.553-1.408)      |
| <b>Perineural invasion</b> |                           |                             |                          |                           |                             |                          |
| No/Yes                     | <b>0.046</b>              | 0.181                       | 0.456 (0.144-1.441)      | <b>0.026</b>              | 0.601                       | 0.743 (0.244-2.262)      |
| <b>CA19-9</b>              |                           |                             |                          |                           |                             |                          |
| < 37/ ≥ 37 U/L             | 0.447                     | NA                          |                          | 0.823                     |                             |                          |
| <b>CEA</b>                 |                           |                             |                          |                           |                             |                          |
| < 5/ ≥ 5 ng/mL             | 0.499                     | NA                          |                          | 0.396                     |                             |                          |
| <b>TBIL</b>                |                           |                             |                          |                           |                             |                          |

|                                        |                  |                  |                     |                  |                  |                     |  |
|----------------------------------------|------------------|------------------|---------------------|------------------|------------------|---------------------|--|
| ≤ 20.4/ > 20.4 μmol/L                  | 0.805            | NA               |                     | 0.866            |                  |                     |  |
| <b>Albumin</b>                         |                  |                  |                     |                  |                  |                     |  |
| < 35/ ≥ 35 g/L                         | 0.408            | NA               |                     | 0.288            |                  |                     |  |
| <b>ALT</b>                             |                  |                  |                     |                  |                  |                     |  |
| ≤ 35/ > 35 U/L                         | 0.681            | NA               |                     | 0.818            |                  |                     |  |
| <b>AST</b>                             |                  |                  |                     |                  |                  |                     |  |
| ≤ 40/ > 40 U/L                         | 0.689            | NA               |                     | 0.664            |                  |                     |  |
| <b>GGT</b>                             |                  |                  |                     |                  |                  |                     |  |
| ≤ 60/ > 60 U/L                         | 0.669            | NA               |                     | 0.342            |                  |                     |  |
| <b>Glucose</b>                         |                  |                  |                     |                  |                  |                     |  |
| ≤ 5.6/ > 5.6 mmol/L                    | 0.729            | NA               |                     | 0.316            |                  |                     |  |
| <b>Tumor-associated neutrophils</b> N1 | <b>&lt;0.001</b> | <b>&lt;0.001</b> | 0.877 (0.833-0.924) | <b>&lt;0.001</b> | <b>&lt;0.001</b> | 0.906 (0.869-0.938) |  |
| <b>Tumor-associated neutrophils</b> N2 | <b>&lt;0.001</b> | <b>0.023</b>     | 1.030 (1.004-1.057) | <b>&lt;0.001</b> | <b>0.018</b>     | 1.026 (1.004-1.048) |  |
| <b>Tumor-infiltrating Tregs</b>        | <b>0.001</b>     | <b>0.014</b>     | 1.032 (1.006-1.059) | <b>&lt;0.001</b> | <b>0.001</b>     | 1.043 (1.018-1.070) |  |
| <b>Tumor-infiltrating CD8+ T cells</b> | <b>0.002</b>     | <b>0.025</b>     | 0.990 (0.981-0.999) | <b>0.019</b>     | 0.258            | 0.005(0.996-1.014)  |  |
