# Supplementary material
Source: HighWire-hosted journal article supplement (https://jitc.bmj.com/content/10/12/e005798)
Supplement: inline-supplementary-material-4 [file inline-supplementary-material-4.pdf]

**Supplementary Table 2. Relationships between tumor-associated N1, N2 and N1/N2 ratio and clinicopathological characteristics in the validation cohort.**

| <b>Variables</b>           | <b>Low N1<br/>(n=12)</b> | <b>High N1<br/>(n=17)</b> | <b>P value</b> | <b>Low N2<br/>(n=19)</b> | <b>High N2<br/>(n=10)</b> | <b>P value</b> | <b>Low N1/N2<br/>(n=14)</b> | <b>High N1/N2<br/>(n=15)</b> | <b>P value</b> |
|----------------------------|--------------------------|---------------------------|----------------|--------------------------|---------------------------|----------------|-----------------------------|------------------------------|----------------|
| <b>Gender</b>              |                          |                           | 0.595          |                          |                           | 0.937          |                             |                              | 0.917          |
| Male/ Female               | 8/4                      | 14/3                      |                | 15/4                     | 7/3                       |                | 10/4                        | 12/3                         |                |
| <b>Age (years)</b>         |                          |                           | 0.774          |                          |                           | 0.424          |                             |                              | 0.588          |
| <65/ ≥ 65                  | 7/5                      | 9/8                       |                | 12/7                     | 4/6                       |                | 7/7                         | 9/6                          |                |
| <b>Primary site</b>        |                          |                           | 0.774          |                          |                           | 1.000          |                             |                              | 0.837          |
| Head/ Body or tail         | 5/7                      | 8/9                       |                | 9/10                     | 4/6                       |                | 6/8                         | 7/8                          |                |
| <b>Differentiation</b>     |                          |                           | 0.506          |                          |                           | 0.122          |                             |                              | 0.341          |
| I/ II/ III                 | 2/3/7                    | 1/7/9                     |                | 3/8/8                    | 0/2/8                     |                | 2/3/9                       | 1/7/7                        |                |
| <b>T stage</b>             |                          |                           | 0.727          |                          |                           | 1.000          |                             |                              | 0.445          |
| T1+T2/ T3+T4               | 10/2                     | 12/5                      |                | 14/5                     | 8/2                       |                | 12/2                        | 10/5                         |                |
| <b>N stage</b>             |                          |                           | 0.176          |                          |                           | 0.798          |                             |                              | 0.573          |
| N0/N1-2                    | 4/8                      | 10/7                      |                | 10/9                     | 4/6                       |                | 6/8                         | 8/7                          |                |
| <b>TNM stage</b>           |                          |                           | 0.865          |                          |                           | 0.897          |                             |                              | 0.574          |
| I/ II/ III                 | 4/6/2                    | 6/7/4                     |                | 6/9/4                    | 4/4/2                     |                | 6/6/2                       | 4/7/4                        |                |
| <b>Perineural invasion</b> |                          |                           | 1.000          |                          |                           | 0.583          |                             |                              | 1.000          |
| No / Yes                   | 2/10                     | 4/13                      |                | 5/14                     | 1/9                       |                | 3/11                        | 1/12                         |                |
| <b>CA19-9</b>              |                          |                           | 0.968          |                          |                           | 0.298          |                             |                              | 0.316          |
| < 37/≥37 U/L               | 4/8                      | 7/10                      |                | 9/10                     | 2/8                       |                | 4/10                        | 7/8                          |                |
| <b>CEA</b>                 |                          |                           | 1.000          |                          |                           | 0.937          |                             |                              | 0.917          |
| < 5/ ≥ 5 ng/mL             | 9/3                      | 13/4                      |                | 15/4                     | 7/3                       |                | 10/4                        | 12/3                         |                |
| <b>TBIL</b>                |                          |                           | 1.000          |                          |                           | 0.937          |                             |                              | 0.917          |
| ≤ 20.4/>20.4 μmol/L        | 9/3                      | 13/4                      |                | 15/4                     | 7/3                       |                | 10/4                        | 12/3                         |                |

|                                                   |      |      |              |      |     |              |      |      |                  |
|---------------------------------------------------|------|------|--------------|------|-----|--------------|------|------|------------------|
| <b>Albumin</b>                                    |      |      | 0.570        |      |     | 0.817        |      |      | 1.000            |
| < 35/ ≥ 35 g/L                                    | 1/11 | 4/13 |              | 4/15 | 1/9 |              | 2/12 | 3/12 |                  |
| <b>ALT</b>                                        |      |      | 0.968        |      |     | 0.813        |      |      | 0.812            |
| ≤ 35/ > 35 U/L                                    | 8/4  | 10/7 |              | 11/8 | 7/3 |              | 9/5  | 9/6  |                  |
| <b>AST</b>                                        |      |      | 0.873        |      |     | 1.000        |      |      | 0.596            |
| ≤ 40/ > 40 U/L                                    | 8/4  | 13/4 |              | 14/5 | 7/3 |              | 9/5  | 12/3 |                  |
| <b>GGT</b>                                        |      |      | 0.873        |      |     | 1.000        |      |      | 0.596            |
| ≤ 60/ > 60 U/L                                    | 8/4  | 13/4 |              | 14/5 | 7/3 |              | 9/5  | 12/3 |                  |
| <b>Glucose</b>                                    |      |      | 0.219        |      |     | 0.424        |      |      | <b>0.042</b>     |
| ≤ 5.6/ >5.6 mmol/L                                | 7/5  | 6/11 |              | 7/12 | 6/4 |              | 9/5  | 4/11 |                  |
| <b>Tumor-associated N1 neutrophils</b>            |      |      | /            |      |     | <b>0.008</b> |      |      | <b>&lt;0.001</b> |
| Low/ High                                         | /    | /    |              | 4/15 | 8/2 |              | 12/2 | 0/15 |                  |
| <b>Tumor-associated N2 neutrophils</b>            |      |      | <b>0.008</b> |      |     | /            |      |      | <b>&lt;0.001</b> |
| Low/ High                                         | 4/8  | 15/2 |              | /    | /   |              | 4/10 | 15/0 |                  |
| <b>Tumor-infiltrating CD8<sup>+</sup> T cells</b> |      |      | <b>0.010</b> |      |     | <b>0.019</b> |      |      | <b>0.001</b>     |
| Low/ High                                         | 10/2 | 6/11 |              | 7/12 | 9/1 |              | 12/2 | 4/11 |                  |
| <b>Tumor-infiltrating Tregs</b>                   |      |      | 0.071        |      |     | 0.119        |      |      | 0.089            |
| Low/ High                                         | 3/9  | 10/7 |              | 11/8 | 2/8 |              | 4/10 | 9/6  |                  |
