# Supplementary material
Source: HighWire-hosted journal article supplement (https://jitc.bmj.com/content/10/12/e005798)
Supplement: inline-supplementary-material-8 [file inline-supplementary-material-8.pdf]

**Supplementary Table 4. Univariate and multivariate analysis of prognostic factors associated with overall survival and recurrence-free survival in the validation cohort.**

| Variables                  | Overall survival          |                             |                          | Recurrence-free survival  |                             |                          |
|----------------------------|---------------------------|-----------------------------|--------------------------|---------------------------|-----------------------------|--------------------------|
|                            | Univariate <i>P</i> value | Multivariate <i>P</i> value | Multivariate HR (95% CI) | Univariate <i>P</i> value | Multivariate <i>P</i> value | Multivariate HR (95% CI) |
| <b>Gender</b>              |                           |                             |                          |                           |                             |                          |
| Male/Female                | 0.936                     | NA                          |                          | 0.380                     |                             |                          |
| <b>Age (years)</b>         |                           |                             |                          |                           |                             |                          |
| <65/≥65                    | 0.313                     | NA                          |                          | <b>0.021</b>              | 0.050                       | 3.808 (0.998-14.530)     |
| <b>Primary site</b>        |                           |                             |                          |                           |                             |                          |
| Head/Body or tail          | 0.566                     | NA                          |                          | 0.491                     |                             |                          |
| <b>Differentiation</b>     |                           |                             |                          |                           |                             |                          |
| I/II/III                   | 0.111                     | NA                          |                          | 0.109                     |                             |                          |
| <b>T stage</b>             |                           |                             |                          |                           |                             |                          |
| T1+T2/ T3+T4               | 0.183                     | NA                          |                          | 0.843                     |                             |                          |
| <b>N stage</b>             |                           |                             |                          |                           |                             |                          |
| N0/N1-2                    | 0.178                     | NA                          |                          | 0.163                     |                             |                          |
| <b>TNM stage</b>           |                           |                             |                          |                           |                             |                          |
| I/II/III                   | 0.342                     | NA                          |                          | 0.291                     |                             |                          |
| <b>Perineural invasion</b> |                           |                             |                          |                           |                             |                          |
| No/Yes                     | 0.232                     | NA                          |                          | <b>0.046</b>              | 0.192                       | 4.265 (0.484-37.605)     |
| <b>CA19-9</b>              |                           |                             |                          |                           |                             |                          |
| < 37/ ≥ 37 U/L             | 0.410                     | NA                          |                          | 0.748                     |                             |                          |
| <b>CEA</b>                 |                           |                             |                          |                           |                             |                          |
| < 5/ ≥ 5 ng/mL             | 0.701                     | NA                          |                          | 0.352                     |                             |                          |
| <b>TBIL</b>                |                           |                             |                          |                           |                             |                          |

|                                        |              |              |                     |              |              |                     |
|----------------------------------------|--------------|--------------|---------------------|--------------|--------------|---------------------|
| ≤ 20.4/ > 20.4 μmol/L                  | 0.394        | NA           |                     | 0.125        |              |                     |
| <b>Albumin</b>                         |              |              |                     |              |              |                     |
| < 35/ ≥ 35 g/L                         | 0.249        | NA           |                     | 0.666        |              |                     |
| <b>ALT</b>                             |              |              |                     |              |              |                     |
| ≤ 35/ > 35 U/L                         | 0.628        | NA           |                     | 0.613        |              |                     |
| <b>AST</b>                             |              |              |                     |              |              |                     |
| ≤ 40/ > 40 U/L                         | 0.798        | NA           |                     | 0.831        |              |                     |
| <b>GGT</b>                             |              |              |                     |              |              |                     |
| ≤ 60/ > 60 U/L                         | 0.577        | NA           |                     | 0.822        |              |                     |
| <b>Glucose</b>                         |              |              |                     |              |              |                     |
| ≤ 5.6/ > 5.6 mmol/L                    | 0.145        | NA           |                     | 0.315        |              |                     |
| <b>Tumor-associated neutrophils N1</b> | <b>0.013</b> | 0.136        | 0.940 (0.866-1.020) | <b>0.008</b> | 0.444        | 0.975 (0.914-1.040) |
| <b>Tumor-associated neutrophils N2</b> | <b>0.002</b> | <b>0.045</b> | 1.069 (0.993-1.149) | <b>0.001</b> | <b>0.043</b> | 1.067 (1.002-1.153) |
| <b>Tumor-infiltrating Tregs</b>        | <b>0.034</b> | 0.970        | 0.997 (0.867-1.147) | <b>0.001</b> | 0.784        | 0.991 (0.893-1.101) |
| <b>Tumor-infiltrating CD8+ T cells</b> | <b>0.016</b> | 0.699        | 1.019 (0.925-1.124) | <b>0.002</b> | 0.789        | 0.988 (0.906-1.078) |
